# Supplementary figures and images for: Whole exome sequencing reveals the genetic heterogeneity and evolutionary history of primary gliomas and matched recurrences
Source: PubMed Central journal article supplement — Comput Struct Biotechnol J. 2022 Apr 29;20:2235–46. doi: 10.1016/j.csbj.2022.04.034 (PMC9117816; doi:10.1016/j.csbj.2022.04.034), 2022-04-29

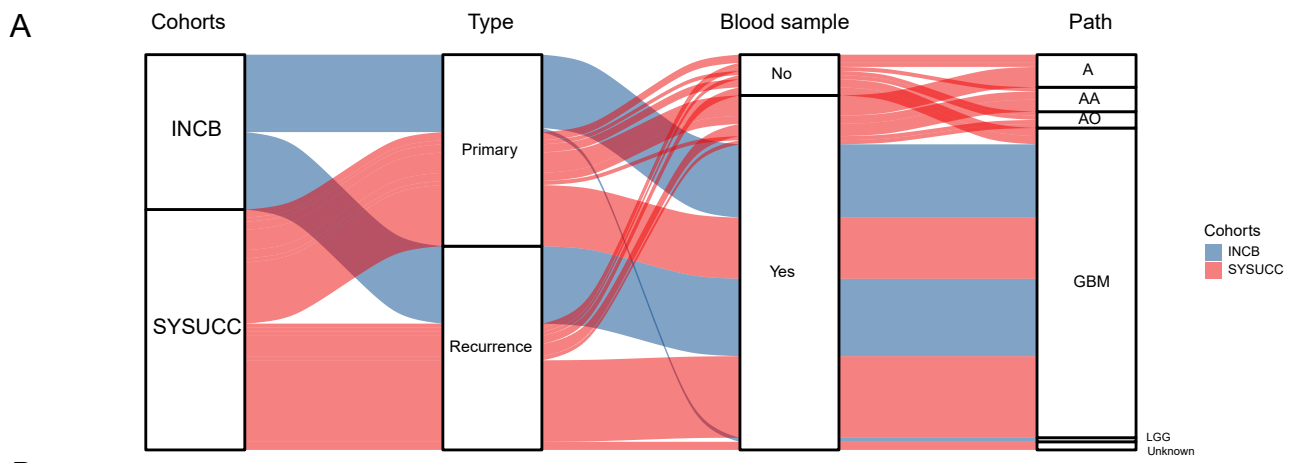

**B**

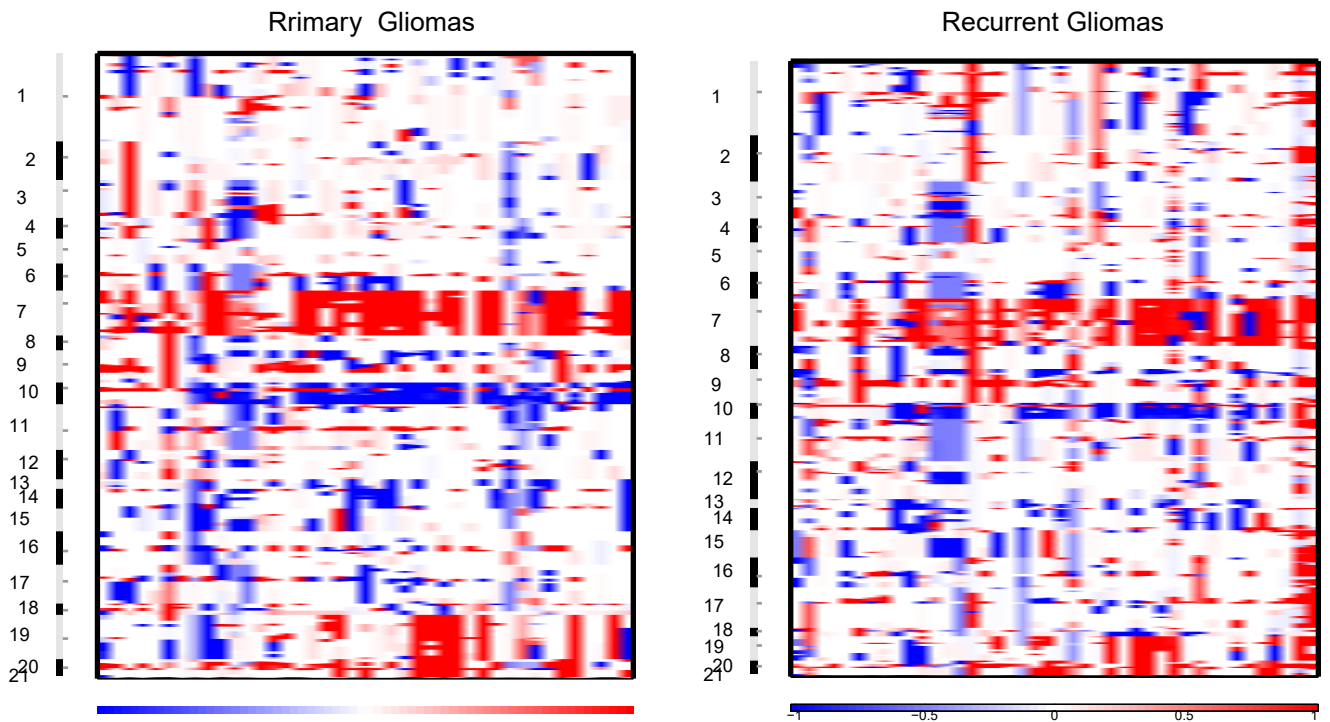

**C**

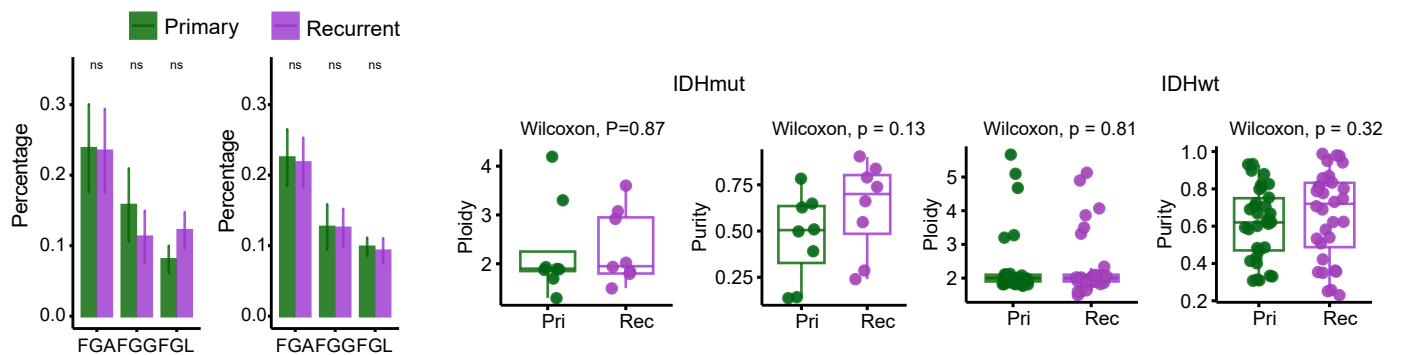

Supplement: mmc1.pdf [file mmc1.pdf]

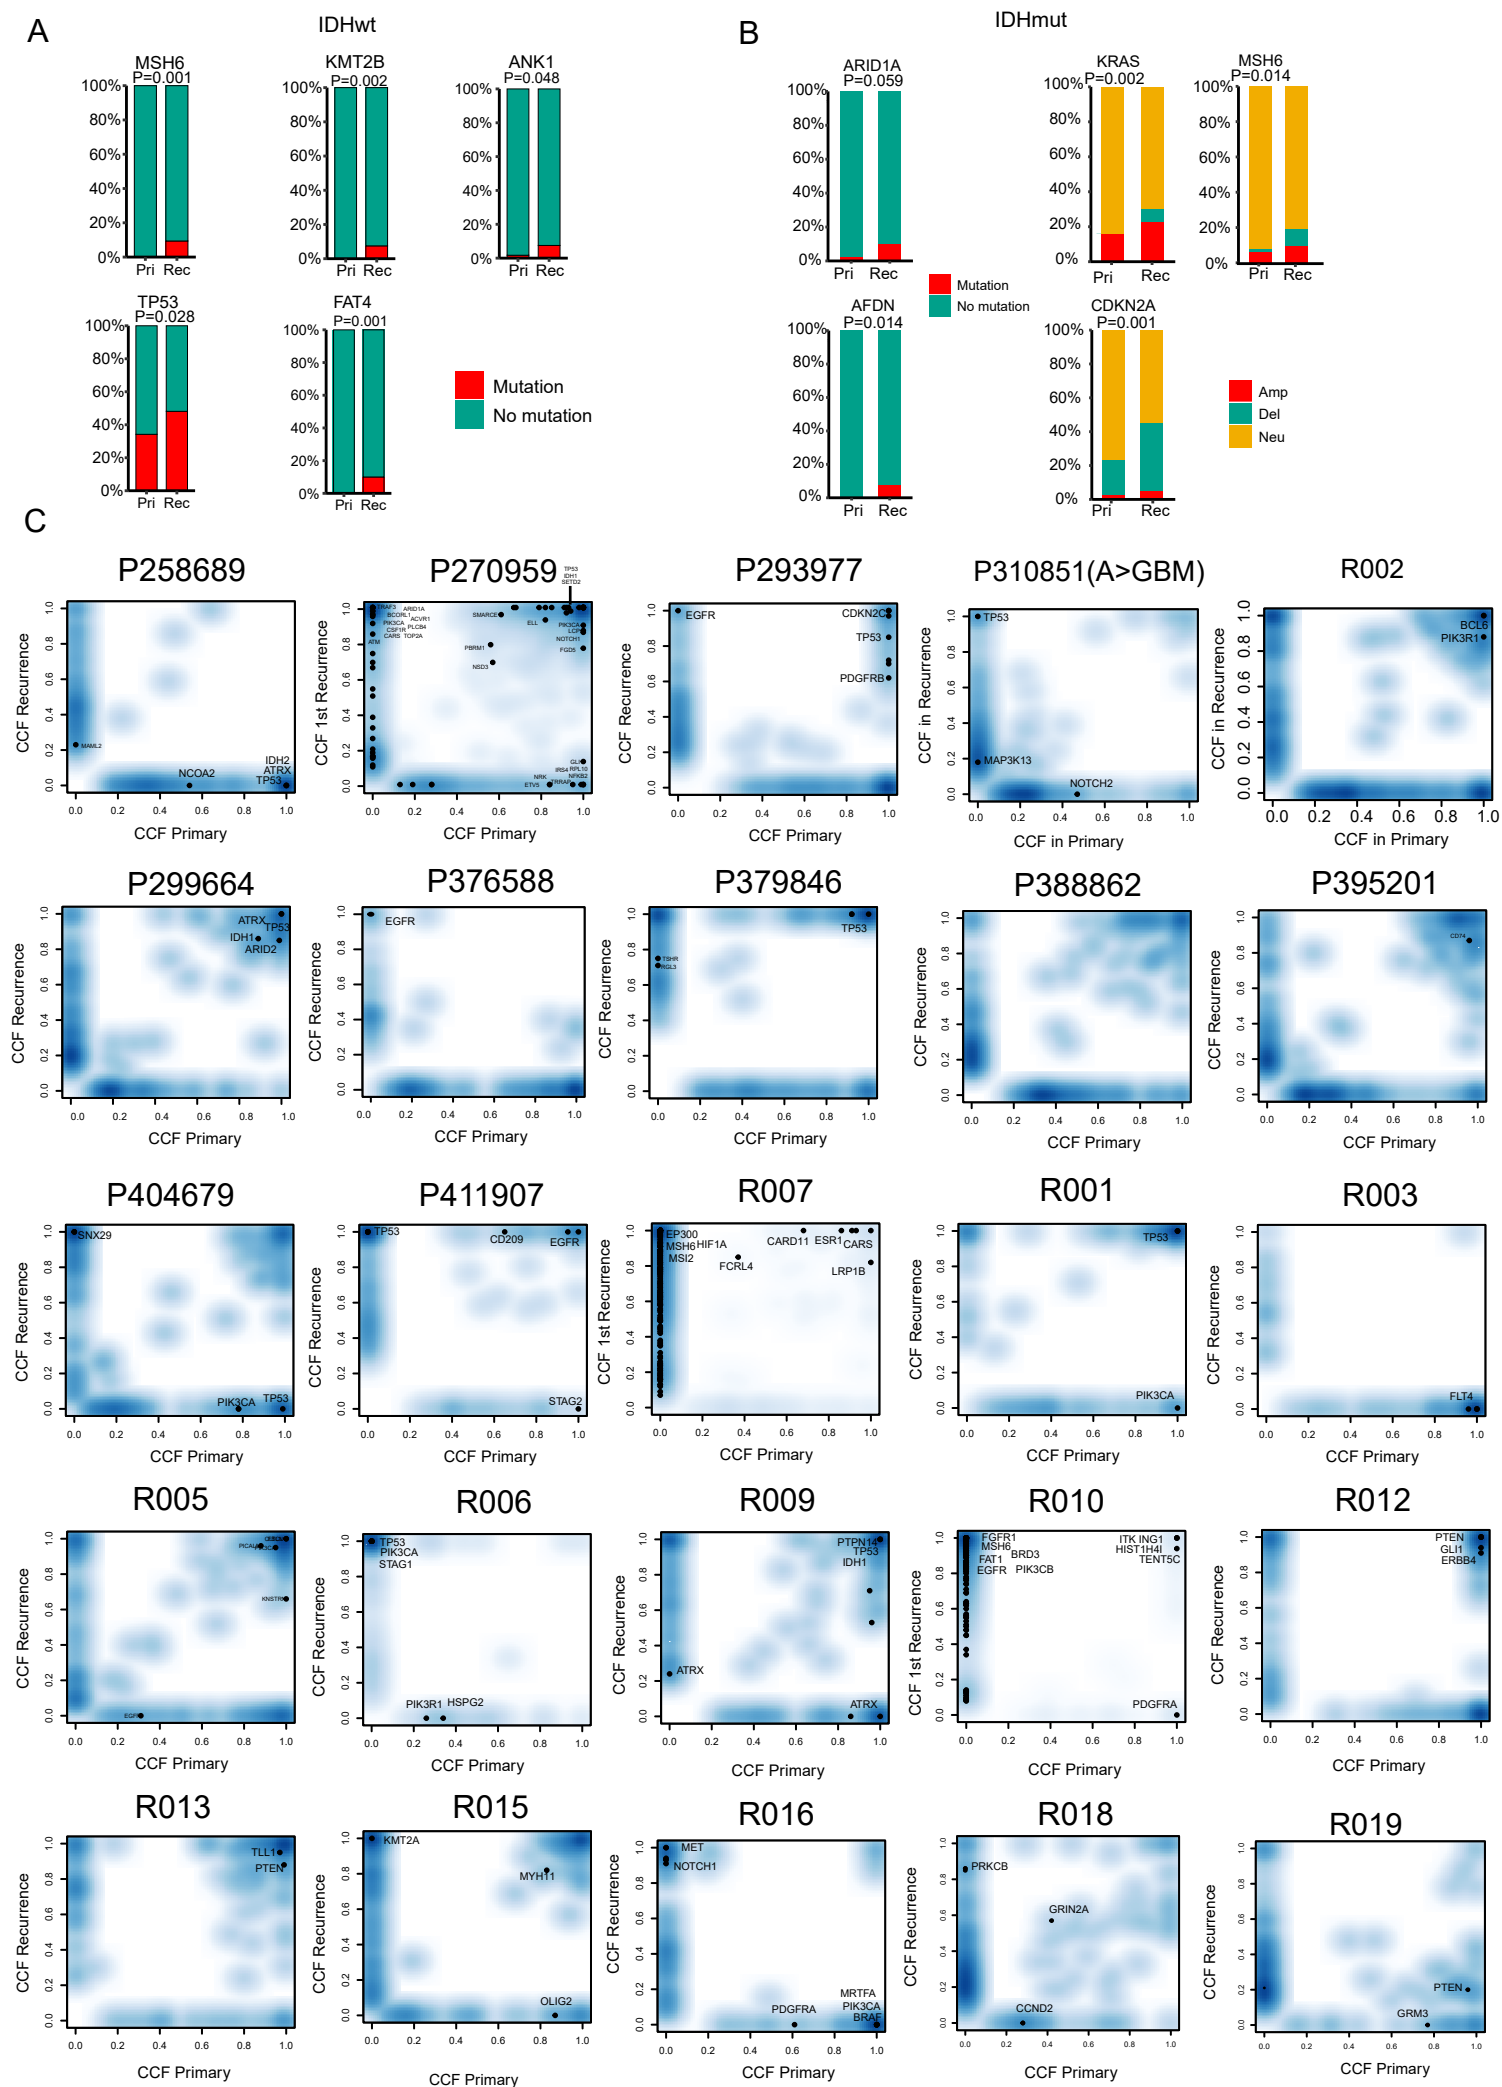

Supplement: mmc2.pdf [file mmc2.pdf]

# Supplementary Fig 4

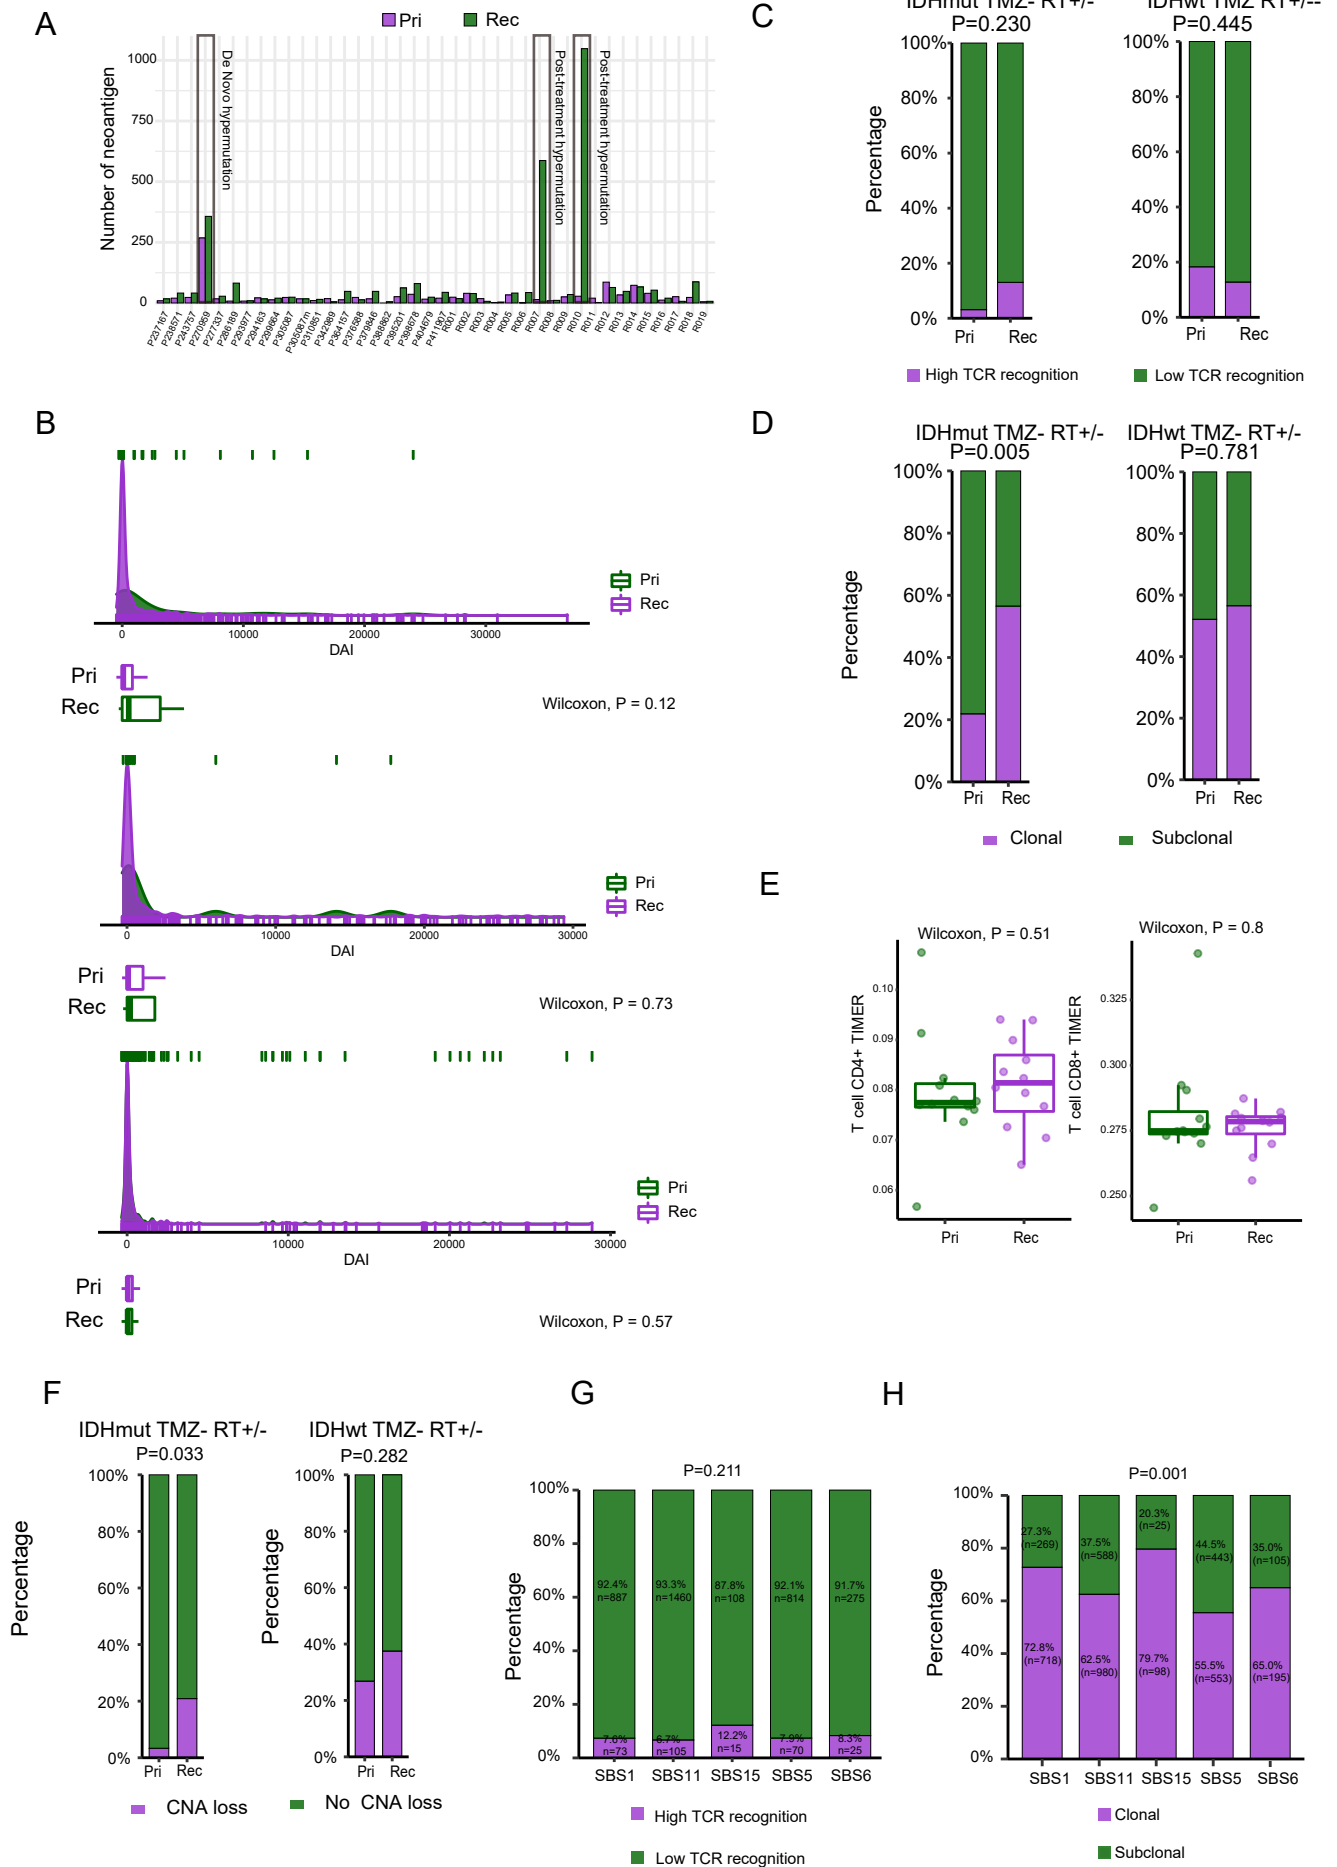

Supplement: mmc3.pdf [file mmc3.pdf]
